# Supplementary material for: Nitrile groups as hydrogen-bond acceptors in a donor-rich hydrogen-bonding network
Source: Royal Society of Chemistry journal article supplement (doi:10.1039/c2ce26052b), 2012-01-01
Supplement: c2ce26052b.pdf [file c2ce26052b.pdf]

# Nitrile Groups as Hydrogen-Bond Acceptors in a Donor-Rich Hydrogen-Bonding Network

David R. Turner,<sup>\*a</sup> Alison J. Edwards<sup>b</sup> and Ross O. Piltz<sup>b</sup>

## Supplementary Information

### Section 1 – Structural Parameters and Diagrams

**Table S1** Hydrogen-bonding interactions in (NH<sub>2</sub>)<sub>3</sub>C cdm from neutron data (c.f. Table 1, main manuscript).

| Interaction   | D-H (Å)  | H···A (Å) | D···A (Å) | D-H···A (°) |
|---------------|----------|-----------|-----------|-------------|
| N(1)···O(1)#1 | 1.014(4) | 1.882(4)  | 2.889(2)  | 171.6(3)    |
| N(1)···N(2)#2 | 0.993(4) | 2.445(5)  | 3.131(2)  | 125.8(3)    |
| N(4)···O(1)#3 | 1.008(5) | 1.998(5)  | 2.877(2)  | 144.1(4)    |
| N(4)···N(2)   | 0.998(4) | 2.242(5)  | 3.122(2)  | 146.2(3)    |
| N(5)···O(1)#3 | 1.007(4) | 1.981(4)  | 2.881(2)  | 147.5(3)    |
| N(5)···N(3)#4 | 1.004(4) | 2.291(4)  | 3.155(2)  | 143.5(3)    |
| N(6)···N(2)   | 1.003(4) | 2.147(4)  | 3.054(2)  | 149.5(3)    |
| N(6)···N(3)#4 | 1.007(4) | 2.021(4)  | 2.962(2)  | 154.5(4)    |

<sup>a</sup> Symmetry equivalents used; #1, -x, -y+1, -z; #2, -x+1, -y+1, -z; #3, 1+x, y-1, z; #4, 1-x, y-3/2, 1/2-z.

**Table S2** Hydrogen-bonding interactions in (NH<sub>2</sub>)<sub>3</sub>C cdm from X-ray data.

| Interaction   | D-H (Å)   | H···A (Å) | D···A (Å)  | D-H···A (°) |
|---------------|-----------|-----------|------------|-------------|
| N(1)···O(1)#1 | 0.870(16) | 2.032(16) | 2.8967(13) | 172.6(14)   |
| N(1)···N(2)#2 | 0.878(16) | 2.520(16) | 3.1243(15) | 126.6(13)   |
| N(4)···O(1)#3 | 0.886(17) | 2.101(17) | 2.8750(14) | 145.5(14)   |
| N(4)···N(2)   | 0.887(17) | 2.334(18) | 3.1231(15) | 148.2(15)   |
| N(5)···O(1)#3 | 0.869(18) | 2.090(18) | 2.8798(15) | 150.7(14)   |
| N(5)···N(3)#4 | 0.896(17) | 2.360(17) | 3.1526(16) | 147.5(14)   |
| N(6)···N(2)   | 0.899(17) | 2.240(17) | 3.0603(15) | 151.5(15)   |
| N(6)···N(3)#4 | 0.894(19) | 2.124(19) | 2.9607(15) | 155.6(15)   |

<sup>a</sup> Symmetry equivalents used as per Table 1

**Table S3:** Deviations from least-squares mean plane of C5-N4-N5-N6 (the guanidinium cation) in ((NH<sub>2</sub>)<sub>3</sub>C)(cdm) from neutron diffraction data.

|     |                  |
|-----|------------------|
| C5  | -0.0155 (0.0013) |
| N4  | 0.0052 (0.0004)  |
| N5  | 0.0051 (0.0004)  |
| N6  | 0.0052 (0.0004)  |
| H4A | -0.0515 (0.0049) |
| H4B | -0.0761 (0.0050) |
| H5A | -0.1541 (0.0048) |
| H5B | -0.1694 (0.0044) |
| H6A | -0.0235 (0.0047) |
| H6B | -0.0816 (0.0049) |

**Table S4:** Deviations from least-squares mean plane of non-hydrogen atoms in the cdm anion from neutron diffraction data.

|     |                  |
|-----|------------------|
| C1  | 0.0453 (0.0015)  |
| C2  | 0.0041 (0.0013)  |
| C3  | 0.0238 (0.0013)  |
| C4  | 0.0035 (0.0014)  |
| N1  | 0.0183 (0.0011)  |
| N2  | -0.0359 (0.0010) |
| N3  | -0.0163 (0.0009) |
| O1  | -0.0429 (0.0014) |
| H1A | 0.0226 (0.0040)  |
| H1B | 0.1347 (0.0050)  |

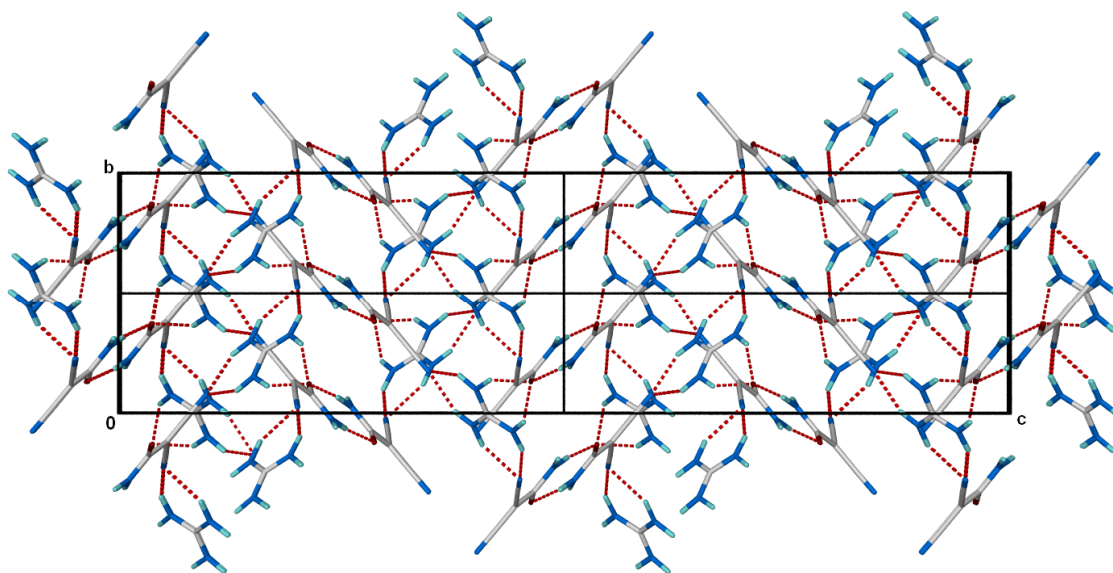

**Figure S1:** Crystal packing of  $((\text{NH}_2)_3\text{C})(\text{cdm})$  viewed along the  $a$ -axis.

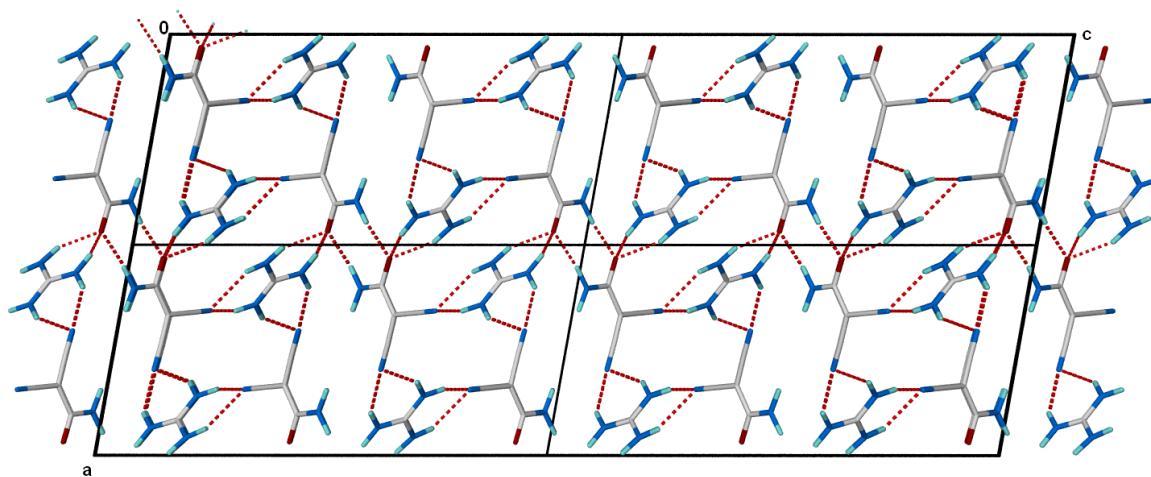

**Figure S2:** Crystal packing of  $((\text{NH}_2)_3\text{C})(\text{cdm})$  viewed along the  $b$ -axis.

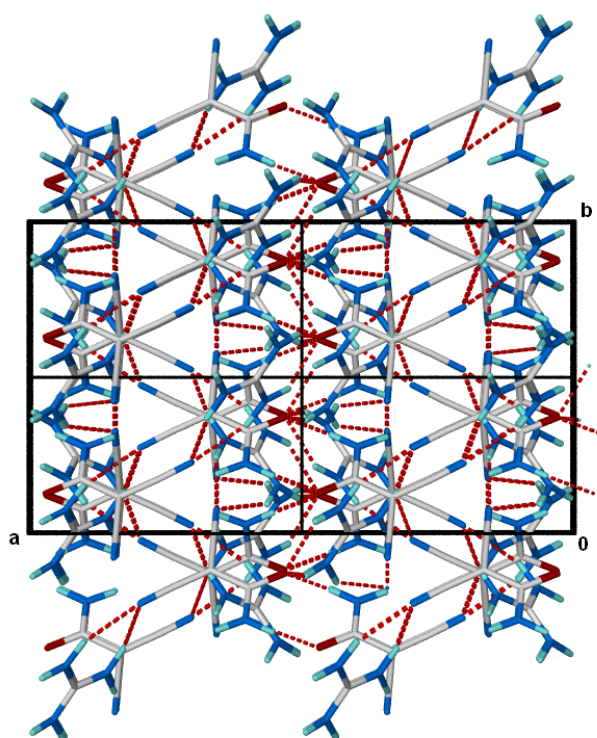

**Figure S3:** Crystal packing of  $((\text{NH}_2)_3\text{C})(\text{cdm})$  viewed along the  $c$ -axis.

## Section 2 - Cambridge Structural Database Search Details and Results

### *Search Details*

Searches were carried out using CSD Version 5.33 (November 2011) + 1 update (Feb 2012). In all cases the search parameters required the H $\cdots$ N contacts to be within the sum of the vdW radii (N + H = 2.750 Å). For searches containing 6-membered chelating rings with two NH donor groups it was specified that there must be a non-metal atom between the two nitrogen atoms in order to remove coordinated en/pn from results. Metal-coordinated nitriles (i.e. CN $^-$  ligands) were excluded from all searches. No filters were placed on the bond orders within the chelating donor group.

Results from all searches were limited to those entries that had 3D coordinates determined, R factors  $\leq$  0.1 and no disorder or errors. All X-H distances were normalised to neutron distances.

### *General NH $\cdots$ Nitrile Interactions*

An initial search was conducted to examine the spread of distances and geometries of NH $\cdots$ N interactions to organic nitrile groups regardless of what supramolecular motifs they are involved in. Plots shown in Figure S4 show the distribution of NH $\cdots$ N distances that were found for the entire data sample as well as for two sub-categories, SCN groups and acetonitrile molecules. These two sub-classes are very prevalent in the database and were examined briefly to determine whether the type of species that the nitrile group is part of (and therefore the electronic nature of the nitrile group) has any major change on the length of the hydrogen-bonding interaction. The mean NH $\cdots$ N distance for all interactions is 2.211 Å with the mean observed for SCN being slightly shorter (2.116 Å) and that for MeCN being slightly longer (2.223 Å) as would be expected. For the purposes of our intended study (the asymmetry of R $_2^1(6)$  motifs) no distinction will be made between these sub-classes of nitrile acceptor groups.

The NH $\cdots$ Nitrile dataset was also analysed for any relationship between the NH $\cdots$ N distance and the angle of approach, in terms of both the NH $\cdots$ N and C $\equiv$ N $\cdots$ H angles. These distance vs. angle scatter plots (Figure S5) show a definite preference for both the NH $\cdots$ N and C $\equiv$ N $\cdots$ H angles to approach linearity from the clustering of points. Whilst this is generally expected for the NH $\cdots$ N interaction it is very interesting to note this trend for the C $\equiv$ N $\cdots$ H angle which supports the work of Le Questel showing that the minimum electrostatic potential lies at, or near, the lone pair of the *sp* nitrogen atom (see main paper). In addition to this clustering both plots demonstrate a general trend that longer NH $\cdots$ N distances are associated with more acute angles with the trend being more pronounced for NH $\cdots$ N angles than C $\equiv$ N $\cdots$ H angles.

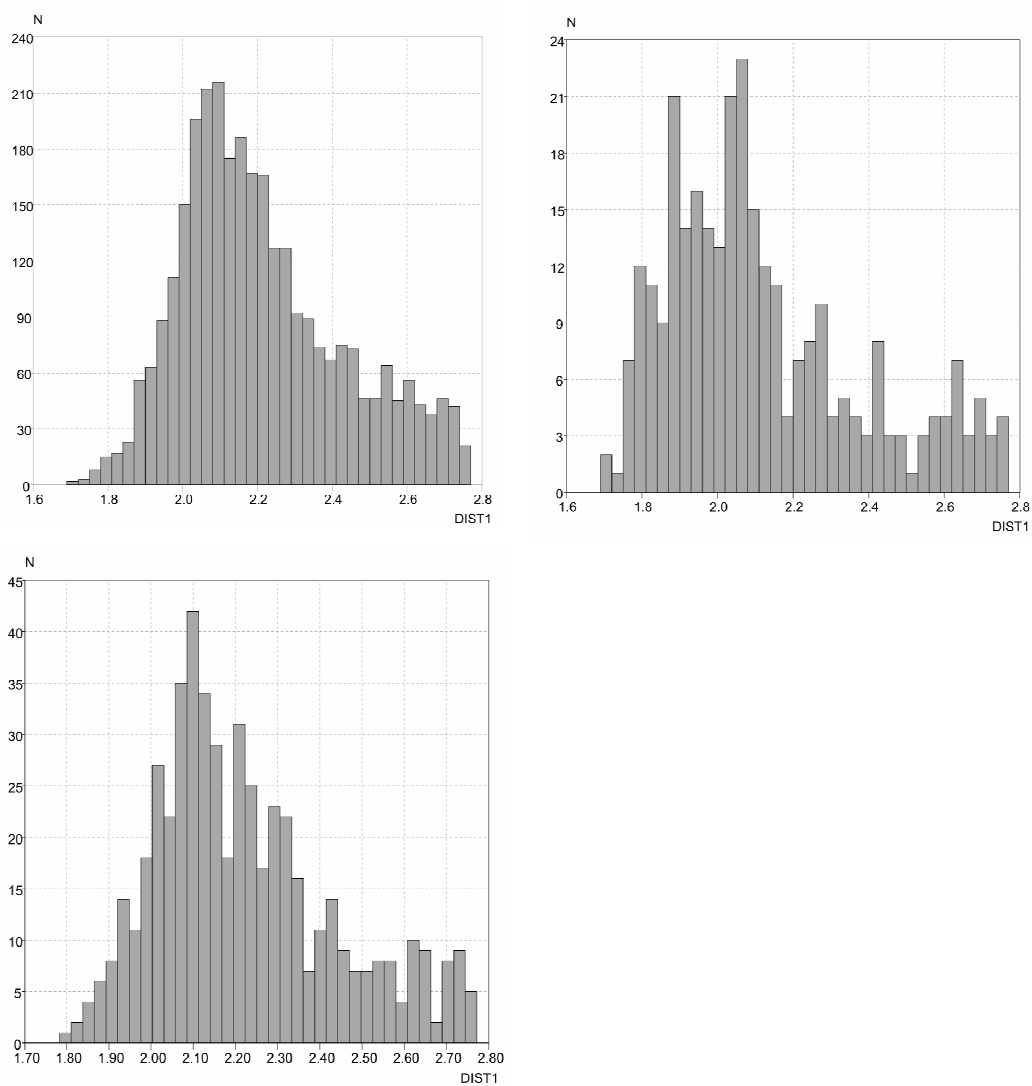

**Figure S4:** Histograms of NH...N hydrogen bonding distances to organic nitrile groups using normalised N-H distances for all nitrile groups (top left), SCN (top right) and MeCN (bottom left). The data show that there are not vast differences in the distribution depending on the type of nitrile.

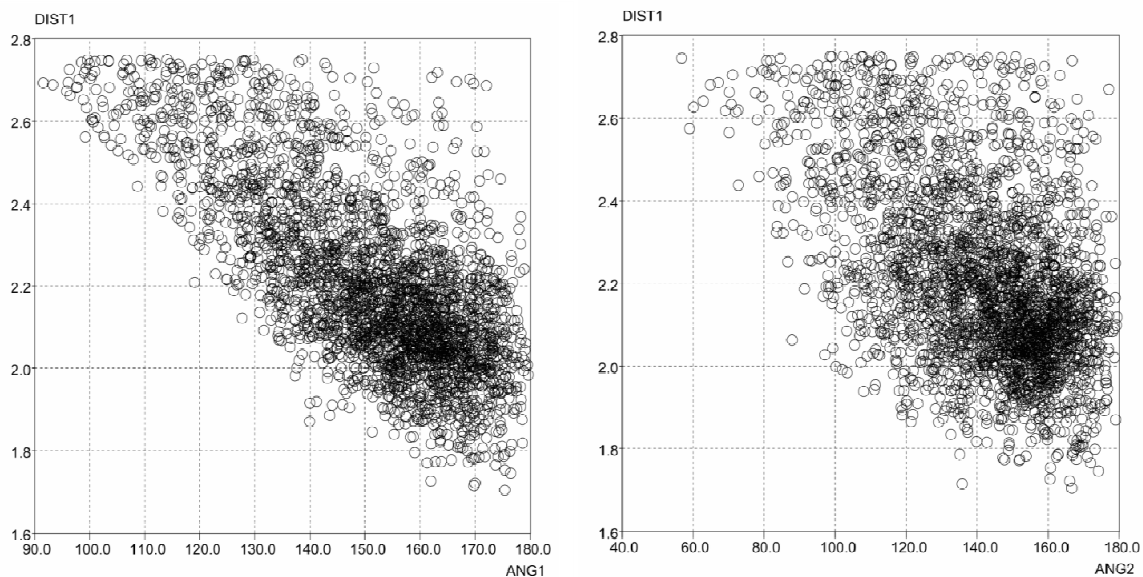

**Figure S5:** Scatter plots for  $\text{N}\cdots\text{H}$  vs  $\text{N-H}\cdots\text{N}$  (left) and  $\text{N}\cdots\text{H}$  vs  $\text{H}\cdots\text{N}\equiv\text{C}$  (right) for all  $\text{NH}\cdots\text{N}$  interactions to organic nitrile groups.

### $R_1^2(6)$ Interactions to Nitrile Groups

A search was conducted using the criteria outlined above to explore the geometrical preferences, if any, associated with  $R_1^2(6)$  hydrogen-bonding motifs involving nitrile as the donor group and two N-H units as the donors. The search resulted in 32 hits one of which, CSD code ABGTCU, was excluded due to nonsensical angles around the  $\text{sp}^2$  nitrogen donor atoms.

Geometric parameters were extracted from the search results according to Figure S6. These are tabulated in Table S4 with  $\theta_1$  set as the largest angle.

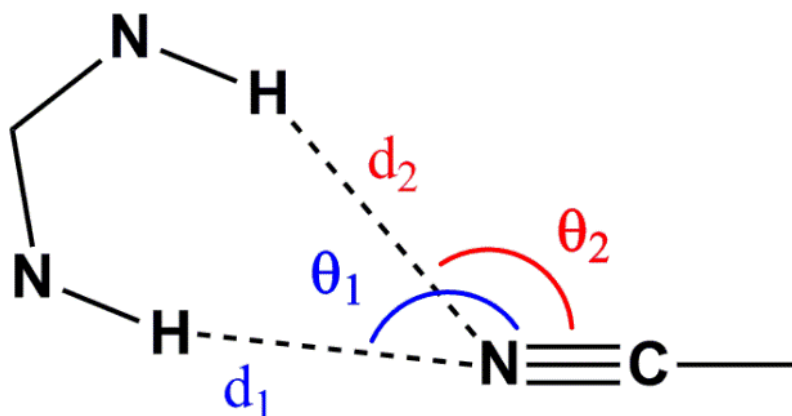

**Figure S6:** Definition of terms used to describe the geometry of hydrogen-bonding interactions in the  $R_1^2(6)$  motif around a nitrile group (*c.f.* Fig. 4, main paper)

**Table S4:** Geometric parameters for . . . Note that for ( $d_2 - d_1$ ) positive values are instances where the more acute  $\theta$  angle has a longer associated  $N\cdots H$  distance.

| CSD RefCode | $\theta_1$ | $\theta_2$ | $d_1$ | $d_2$ | $\theta_1 - \theta_2$ | $d_2 - d_1$ |
|-------------|------------|------------|-------|-------|-----------------------|-------------|
| FANXIC      | 149.391    | 149.113    | 2.721 | 2.084 | 0.278                 | -0.637      |
| BAFSOQ      | 151.324    | 149.772    | 2.375 | 2.367 | 1.552                 | -0.008      |
| MAHVAS      | 154.281    | 151.504    | 1.953 | 2.539 | 2.777                 | 0.586       |
| CYAMPD03    | 136.663    | 124.781    | 2.198 | 2.078 | 11.882                | -0.12       |
| WEPFON      | 150.381    | 137.158    | 2.227 | 1.847 | 13.223                | -0.38       |
| UJETAE      | 135.148    | 121.773    | 2.232 | 1.965 | 13.375                | -0.267      |
| GAFFAV      | 154.982    | 141.359    | 1.955 | 2.342 | 13.623                | 0.387       |
| YOWDAQ      | 125.917    | 112.043    | 2.169 | 2.231 | 13.874                | 0.062       |
| RENTIN      | 159.249    | 144.222    | 2.082 | 2.464 | 15.027                | 0.382       |
| FOWMEJ      | 99.804     | 84.622     | 2.315 | 2.437 | 15.182                | 0.122       |
| RENTIN01    | 159.717    | 144.434    | 2.082 | 2.456 | 15.283                | 0.374       |
| GAFFAV01    | 155.957    | 139.812    | 1.955 | 2.365 | 16.145                | 0.41        |
| GAFFAV01    | 157.568    | 141.13     | 2.004 | 2.308 | 16.438                | 0.304       |
| GAFFAV      | 160.285    | 137.495    | 2.008 | 2.299 | 22.79                 | 0.291       |
| QIXJAJ      | 152.176    | 128.175    | 2.379 | 2.275 | 24.001                | -0.104      |
| DIDRAJ      | 163.365    | 136.927    | 2.055 | 2.503 | 26.438                | 0.448       |
| GITZUF      | 166.301    | 136.312    | 1.875 | 2.472 | 29.989                | 0.597       |
| REMWOV      | 134.757    | 102.009    | 1.897 | 1.992 | 32.748                | 0.095       |
| HIFZUR      | 134.598    | 100.199    | 1.884 | 1.998 | 34.399                | 0.114       |
| TCAGTU      | 107.586    | 70.762     | 2.124 | 2.632 | 36.824                | 0.508       |
| TCAGTU02    | 108.37     | 69.067     | 2.084 | 2.618 | 39.303                | 0.534       |
| DAWDAH      | 167.667    | 127.6      | 1.948 | 2.241 | 40.067                | 0.293       |
| CEKGOP      | 126.022    | 85.749     | 2.104 | 2.715 | 40.273                | 0.611       |
| ZUZXIB      | 150.429    | 109.002    | 1.977 | 2.587 | 41.427                | 0.61        |
| COFRIY10    | 158.162    | 116.678    | 1.984 | 2.599 | 41.484                | 0.615       |
| EMEMUF      | 168.536    | 122.755    | 1.846 | 2.205 | 45.781                | 0.359       |
| COFROE10    | 163.635    | 117.279    | 2.179 | 2.694 | 46.356                | 0.515       |
| PEFGIR      | 156.499    | 109.069    | 2.119 | 2.692 | 47.43                 | 0.573       |
| MAHVAS      | 154.281    | 105.891    | 1.953 | 2.742 | 48.39                 | 0.789       |
| HOXVIA      | 151.806    | 96.908     | 2.318 | 2.464 | 54.898                | 0.146       |
| REXZUP      | 163.005    | 107.003    | 2.291 | 2.056 | 56.002                | -0.235      |
| WUNNUP      | 142.845    | 86.148     | 2.001 | 2.452 | 56.697                | 0.451       |
| TUFDIH      | 155.38     | 98.481     | 2.046 | 2.413 | 56.899                | 0.367       |
| LORLAG      | 164.431    | 107.271    | 1.998 | 2.253 | 57.16                 | 0.255       |

The results in Table S4, in which  $\theta_1$  is set as the largest angle, means that if  $d_2 - d_1$  is a positive value then the longer  $H\cdots N$  distance is associated with the more acute  $H\cdots N\equiv C$  angle in that  $R_1^2(6)$  interaction. Out of the 33 results that are listed only 6 go against this expectations with one of these showing a difference of only 0.008 Å between the two  $H\cdots N$  contacts.
